# Supplementary figures and images for: Delaying the volume-change of CaCo 2 O 4 /rGO as an anode for high-performance lithium-ion and sodium-ion batteries
Source: Royal Society of Chemistry journal article supplement (doi:10.1039/d4dt03061c), 2024-12-23

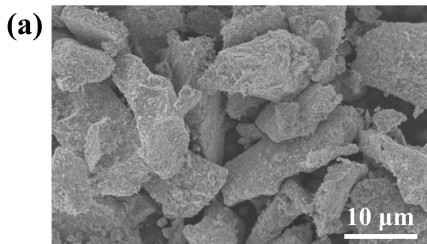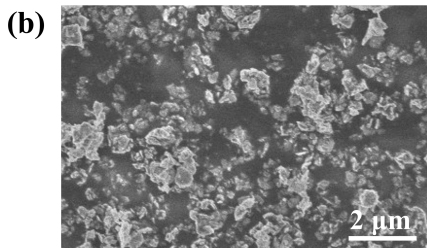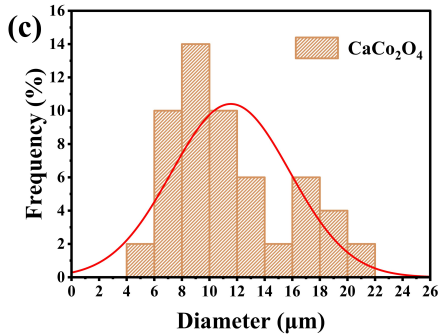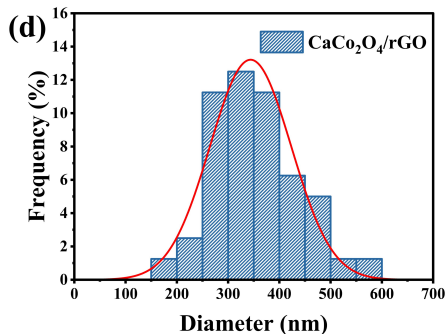

Supplement: d4dt03061c2.pdf [file d4dt03061c2.pdf]
